# Supplementary material for: Bacterial ribosomal RNA detection in cerebrospinal fluid using a viromics approach
Source: Fluids Barriers CNS. 2022 Dec 22;19:102. doi: 10.1186/s12987-022-00400-5 (PMC9773461; doi:10.1186/s12987-022-00400-5)
Supplement: Supplementary file 2 — Additional file 2: Table S1. Baseline characteristics of included patients. Values are n/N (%) or median (interquartile range). Table S2. VIDISCA performance for bacterial diagnostics. [file 12987_2022_400_MOESM2_ESM.xlsx]

## Sheet: Table S1
Table S1. Baseline characteristics of included patients. Values are n/N (%) or median (interquartile range). CSF = cerebrospinal fluid, GCS = Glasgow Coma Scale, CRP = C-reactive protein, GOS = Glasgow Outcome Scale.
	All (N = 89)	S. pneumoniae (n = 24)	N. meningitidis (n = 22)	L. monocytogenes (n = 24)	H. influenzae (n = 18)	K. pneumoniae(n = 1)
Female	39/89 (44)	14/24 (58)	10/22 (45)	6/24 (25)	8/18 (44)	1/1 (100)
Age (years)	58 (34-67)	63 (41-69)	21 (18-42)	61 (47-73)	59 (42-66)	-
Predisposing factors
Otitis/sinusitis	22/82 (27)	14/20 (71)	0/21 (0)	0/22 (0)	8/18 (44)	0/1 (0)
CSF leak	4/87 (5)	1/23 (4)	0/21 (0)	0/24 (0)	3/18 (17)	0/1 (0)
Cancer	10/89 (11)	4/24 (17)	0/22 (0)	5/24 (21)	1/18 (6)	0/1 (0)
Immunosuppressive treatment	12/88 (14)	1/23 (4)	0/22 (0)	11/24 (46)	0/18 (0)	0/1 (0)
Pretreatment with antibiotics	9/87 (10)	2/24 (8)	0/22 (0)	4/23 (17)	3/17 (18)	0/1 (0)
Symptoms
Headache	65/81 (80)	16/21 (76)	17/19 (89)	16/22 (73)	15/18 (83)	1/1 (100)
Fever (>38ºC)	72/81 (89)	17/20 (85)	16/20 (80)	23/24 (96)	15/16 (94)	1/1 (100)
Seizures	2/86 (2)	1/23 (4)	1/20 (5)	0/24 (0)	0/18 (0)	0/1 (0)
GCS score	13 (10-15)	11 (9-13)	15 (11-15)	13 (11-15)	15 (10-15)	-
GCS <14 (altered)	47/89 (53)	19/24 (79)	8/22 (36)	12/24 (50)	7/18 (39)	1/1 (100)
GCS <8 (coma)	10/89 (11)	4/24 (17)	2/22 (9)	1/24 (4)	3/18 (17)	0/1 (100)
Laboratory results
Blood leukocytes (•109/L)	17 (13-21)	20 (12-24)	18 (17-21)	14 (12-17)	14 (12-19)	-
CRP (mg/L)	135 (74-257)	179 (101-312)	230 (133-370)	86 (41-158)	79 (42-126)	-
CSF leukocytes/µl	2560 (768-5680)	2300 (849-7003)	5199 (976-13425)	1250 (324-2355)	3930 (1875-6157)	-
CSF protein (g/L)	3.1 (1.8-5.5)	6.0 (2.8-7.1)	3.4 (1.1-5.2)	2.4 (1.8-4.2)	3.1 (1.3-4.5)	-
CSF/blood glucose ratio	0.09 (0.01-0.31)	0.02 (0.01-0.17)	0.08 (0.01-0.37)	0.26 (0.12-0.39)	0.08 (0.02-0.31)	-
Outcome
Favourable (GOS of 5)	73/89 (82)	21/24 (88)	20/22 (91)	16/24 (67)	16/18 (89)	0/1 (0)
Death	6/89 (7)	2/24 (8)	0/22 (0)	3/24 (13)	0/18 (0)	1/1 (100)

## Sheet: Table S2
Table S2. VIDISCA performance for bacterial diagnostics. Values are proportions (95% confidence intervals).
Sample depth	All	All	All	All	≥10,000	≥10,000	≥10,000	≥10,000	All	All	All	All	≥10,000	≥10,000	≥10,000	≥10,000
Read identity cutoff	≥97%	≥97%	≥97%	≥97%	≥97%	≥97%	≥97%	≥97%	1	1	1	1	1	1	1	1
Minimum pathogen reads	1	1	10	10	1	1	10	10	1	1	10	10	1	1	10	10
Test	Specificity	Sensitivity	Specificity	Sensitivity	Specificity	Sensitivity	Specificity	Sensitivity	Specificity	Sensitivity	Specificity	Sensitivity	Specificity	Sensitivity	Specificity	Sensitivity
All pathogens	0.89 (0.85-0.92)	0.57 (0.46-0.68)	0.99 (0.97-1.00)	0.43 (0.32-0.54)	0.87 (0.82-0.90)	0.69 (0.56-0.79)	0.98 (0.96-0.99)	0.52 (0.40-0.65)	0.91 (0.87-0.94)	0.54 (0.43-0.65)	0.99 (0.98-1.00)	0.40 (0.30-0.51)	0.89 (0.84-0.92)	0.64 (0.52-0.76)	0.99 (0.97-1.00)	0.51 (0.38-0.63)
H. influenzae	1.00 (0.95-1.00)	0.56 (0.31-0.78)	1.00 (0.95-1.00)	0.33 (0.13-0.59)	1.00 (0.93-1.00)	0.71 (0.42-0.92)	1.00 (0.93-1.00)	0.43 (0.18-0.71)	1.00 (0.95-1.00)	0.50 (0.26-0.74)	1.00 (0.95-1.00)	0.33 (0.13-0.59)	1.00 (0.93-1.00)	0.64 (0.35-0.87)	1.00 (0.93-1.00)	0.43 (0.18-0.71)
K. pneumoniae	0.95 (0.89-0.99)	1.00 (0.03-1.00)	1.00 (0.96-1.00)	1.00 (0.03-1.00)	0.94 (0.85-0.98)	1.00 (0.03-1.00)	1.00 (0.95-1.00)	1.00 (0.03-1.00)	0.98 (0.92-1.00)	1.00 (0.03-1.00)	1.00 (0.96-1.00)	1.00 (0.03-1.00)	0.97 (0.89-1.00)	1.00 (0.03-1.00)	1.00 (0.95-1.00)	1.00 (0.03-1.00)
N. meningitidis	0.93 (0.83-0.98)	0.73 (0.50-0.89)	1.00 (0.95-1.00)	0.64 (0.41-0.83)	0.89 (0.76-0.96)	0.76 (0.53-0.92)	1.00 (0.92-1.00)	0.67 (0.43-0.85)	0.96 (0.87-0.99)	0.73 (0.50-0.89)	1.00 (0.95-1.00)	0.64 (0.41-0.83)	0.93 (0.82-0.99)	0.76 (0.53-0.92)	1.00 (0.92-1.00)	0.67 (0.43-0.85)
S. pneumoniae	0.52 (0.40-0.65)	0.79 (0.58-0.93)	0.92 (0.83-0.97)	0.67 (0.45-0.84)	0.47 (0.33-0.62)	0.94 (0.70-1.00)	0.90 (0.79-0.97)	0.88 (0.62-0.98)	0.57 (0.44-0.69)	0.75 (0.53-0.90)	0.95 (0.87-0.99)	0.62 (0.41-0.81)	0.51 (0.37-0.65)	0.88 (0.62-0.98)	0.94 (0.84-0.99)	0.81 (0.54-0.96)
L. monocytogenes	1.00 (0.94-1.00)	0.21 (0.07-0.42)	1.00 (0.94-1.00)	0.04 (0.00-0.21)	1.00 (0.93-1.00)	0.27 (0.08-0.55)	1.00 (0.93-1.00)	0.00 (0.00-0.22)	1.00 (0.94-1.00)	0.17 (0.05-0.37)	1.00 (0.94-1.00)	0.00 (0.00-0.14)	1.00 (0.93-1.00)	0.20 (0.04-0.48)	1.00 (0.93-1.00)	0.00 (0.00-0.22)
